# Supplementary material for: Comprehensive analysis of mitogen-activated protein kinase cascades in chrysanthemum
Source: PeerJ. 2018 Jun 19;6:e5037. doi: 10.7717/peerj.5037 (PMC6014330; doi:10.7717/peerj.5037)
Supplement: Supplemental Information 2 [file peerj-06-5037-s002.xlsx]

## Sheet: Sheet1
Table S1. Primers used in the manuscript.
Primer	Sequence
CmMKK2-RT-F	GGTGTTGAATGGTTTGTGGTATC
CmMKK2-RT-R	GAATGTATTAGCCAGTCCAGAAGTG
CmMKK3-RT-F	ATTGTCTACAGAAAGATGCTGATGC
CmMKK3-RT-R	CAAATGCTGCCAAGTCCACT
CmMKK4-RT-F	CGTCAGATTTTGTCAGGGCTT
CmMKK4-RT-R	CCTTCGTTTATATCCGTGTTTATTC
CmMKK5-RT-F	ACACTGATTTGAACCACGGACA
CmMKK5-RT-R	GGCGGCTGCGACATACAT
CmMKK6-RT-F	CGTCTCAAAACCACCACCTACC
CmMKK6-RT-R	TGATGAACGGGTGACTCAAAAG
CmMKK9-RT-F	AGTTGTACACGCGGACAGTG
CmMKK9-RT-R	ATGGAGAATCCGTTCGTCGT
CmMPK1-RT-F	GAAGTACTTGCACTCGGTAAACA
CmMPK1-RT-R	CGATACCAACGCGTCACAAC
CmMPK3.1-RT-F	GATGTGTGGTCTGTTGGTTGC
CmMPK3.1-RT-R	CTGTGGATAATGTCTGGCGAG
CmMPK3.2-RT-F	AGAAGAGCACTGTCAGTACTTCT
CmMPK3.2-RT-R	GTTCTCTGCATTTGGACGCG
CmMPK4.1-RT-F	TGATCATTGTCGGTATTTTCTTTACCA
CmMPK4.1-RT-R	CACGATGCAAGACATGTGCA
CmMPK4.2-RT-F	TAGATTCCAGAATACATCTCCCG
CmMPK4.2-RT-R	ACACTGGCTCCTCGTTGATTT
CmMPK6-RT-F	GGAGCATTGCCAGTATTTTCTGT
CmMPK6-RT-R	GCTTCAAATCCCTGTGCAGC
CmMPK9.1-RT-F	GCTGCCATTGCCACCACT
CmMPK9.1-RT-R	GACAGAACACCGCTCGCTT
CmMPK9.2-RT-F	CAAATGGGGACCGAGAACC
CmMPK9.2-RT-R	GCCTTAGCAGTGGCGTGG
CmMPK13-RT-F	TTTGTATCAGTTATTGCGTGGATTGA
CmMPK13-RT-R	GCAACAATTCGGGGGCTCTA
CmMPK16-RT-F	GCAACAGTAGAAGTGACAAATGGT
CmMPK16-RT-R	AGAAGCGGGAAGTGGGAAT
CmMPK18-RT-F	GCAAAAGCGTAGTACATCAGTTG
CmMPK18-RT-R	AGTGCCAAAGGGTCGACATT
CmMKK2-F	TTAAGCATTTTTTCAGCATCATG
CmMKK2-R	CTCGCTCTACCCTAGCAATCA
CmMKK3-F	AAATGGCGGGACTAGAGGAG
CmMKK3-R	CGAACCCGTTTGACCTACC
CmMKK4-F	GATCAAAGCACAAAACCCAACT
CmMKK4-R	CCAAAGAACAAGTTGAATAAGTCG
CmMKK5-F	CCCAATTCCCAAACACCC
CmMKK5-R	TAAATTCAAAAAAGAAGCAAAATTAC
CmMKK6-F	AAAGGAATGAAGCCATTGAAAC
CmMKK6-R	AAAAGTTAATAGGGGCTTCCAAG
CmMKK9-F	CTAAGCACATGGCACTCGTTC
CmMKK9-R	GACACTGAGAGTAATTTGTGGTTATA
CmMPK1-F	AAAATGGCAACTCCAGTAGAAC
CmMPK1-R	AATGCTTATTATTAGACTCATAACAAGT
CmMPK3.1-F	ATGGCAGACACAGGAGGTGG
CmMPK3.1-R	AGCAAACCCCGGGTTGT
CmMPK4.1-F	CCACAGAAGCTATGTCTGCAA
CmMPK4.1-R	GTATACATCACCTACACACACATACCT
CmMPK6-F	TCCATTTCATTTCTAGGGCTCA
CmMPK6-R	ACCAAAAGATTCAGCATCAGGT
CmMPK9.1-F	CGGAGAAGAATTACTTGCTAAGCAC
CmMPK9.1-R	TTGAAGCCTTGATACCCGAAT
CmMPK13-F	CAGGTTTCGTGTTAAATGGGC
CmMPK13-R	CCTTATGGTCATTTAGTTAAATTCC
CmMPK16-F	GGGTTTTGTTGGGTTTGAGG
CmMPK16-R	GGGCTCGTTATTCGGCTGT
CmMPK18-F	GGTTTGGTTATTCGTAGTTGTGGTA
CmMPK18-R	AATGACCTCTACGAAAGTCCCAT
CmMKK2-EcoRI-F	CCGGAATTCATGAATAAGGGAAATTTAGC
CmMKK2-BamHI-R	CGCGGATCCTAATGTTGCAAGAGGAGATC
CmMKK3-EcoRI-F	CCGGAATTCATGGCGGGACTAGAGGAGCT
CmMKK3-BamHI-R	CGCGGATCCCTGGATGATGTATAGCTCTT
CmMKK4-NdeI-F	CGCCATATGATGAACAACAACAGCAACATCAAC
CmMKK4-SacI-R	CGAGCTC AGACGAAAATTTTGGTGGT
CmMKK5-EcoRI-F	CCGGAATTCATGAAACCTATCCAACCACC
CmMKK5-SacI-R	TCCGAGCTCAGACGAATTAAACTTTGGCG
CmMKK6-NdeI-F	CGCTCATATGAAAGGAATGAAGCCATTGA
CmMKK6-ClaI-R	CCGTATCGATGTTTCAAAAAGTTAATAGGGGCTT
CmMKK9-EcoRI-F	CCGGAATTCATGGCACTCGTTCGAGAACG
CmMKK9-BamHI-R	CGCGGATCCTATACAAAAAGGGTGTGAAA
CmMPK1-NcoI-F	CATGCCATGGAGATGGCAACTCCAGTAGAACC
CmMPK1-SalI-R	ACGCGTCGACCAACATCATTACCTCTTGAT
CmMPK3.1-ECORI-F	GGCCGAATTCATGGCAGACACAGGAGGTGG
CmMPK3.1-PSTI-R	TGCACTGCAGAGCAAACCCCGGGTTGT
CmMPK4.1-NcoI-F	CATGCCATGGAGATGTCTGCAATGGATACAAG
CmMPK4.1-SalI-R	ACGCGTCGACGTGAGTCGGGTCGGGATTAA
CmMPK6-NcoI-F	CATGCCATGGAGATGGATCCATCAAACCAACA
CmMPK6-SalI-R	ACGCGTCGACCATATTCTGGTACTCGGGAT
CmMPK9.1-NcoI-F	CATGCCATGGAGATGCTTGGCAAGGAATTTTT
CmMPK9.1-SalI-R	ACGCGTCGACAGAACTTAAAGCTGCTAGCT
CmMPK13-NcoI-F	CATGCCATGGAGATGGGCCGTGACGAAGATAA
CmMPK13-SalI-R	ACGCGTCGACAATTCCAGGATAACCTTCTT
CmMPK16-NcoI-F	CATGCCATGGAGATGCAATCTGATCAAAGAAG
CmMPK16-SalI-R	ACGCGTCGACATACCACTGACTACCAGAAC
CmMPK18-NcoI-F	CATGCCATGGAGATGCAGCAGCAAGATCGAAG
CmMPK18-BamHI-R	CGCGGATCCCGAAAGTCCCATATGAACAA
