# Supplementary material for: Comprehensive analysis of mitogen-activated protein kinase cascades in chrysanthemum
Source: PeerJ. 2018 Jun 19;6:e5037. doi: 10.7717/peerj.5037 (PMC6014330; doi:10.7717/peerj.5037)
Supplement: Supplemental Information 3 [file peerj-06-5037-s003.xlsx]

## Sheet: Sheet1
Table S2. Interactions between MKK and MPK revealed by yeast two-hybridization
	MKK2	MKK3	MKK4	MKK5	MKK6	MKK9
MPK1	+	++ ab	+	+	-	+
MPK3	++	++ b	++ ab	++ b	+ b	++ b
MPK4	++ ab	- b	+	+ b	- a	+
MPK6	++ ab	+ b	++ ab	++ ab	+ ab	++ b
MPK9	-	-	-	-	-	-
MPK13	+ ab	-	+	+	+ ab	+
MPK16	-	-	-	- b	-	-
MPK18	+	-	-	-	-	-
++ strong interaction between CmMKK and CmMPK
+ weak interaction between CmMKK and CmMPK
- no interaction between CmMKK and CmMPK
a, positive AtMKK-AtMPK interactions revealed by yeast two-hybridization
b, AtMKK-catalyzed AtMPK phosphorylation demonstrated in vitro and/or in planta
